# Supplementary material for: Plasma Antithrombin III Levels Can Be a Prognostic Factor in Liver Cirrhosis Patients with Portal Vein Thrombosis
Source: MDPI journal article supplement (doi:10.3390/ijms24097732), 2023-04-23
Supplement: s1 [file s1]

Supporting Information Table S1. Comparison of patient characteristics between two groups with AT-III <54% and AT-III ≥54%, excluding HCC-related death.

|                                 | AT-III <54% (n=25)          | AT-III ≥54% (n=36)           |
|---------------------------------|-----------------------------|------------------------------|
| Age, years                      | 66 (61–73)                  | 68 (58–75)                   |
| Sex, male, n (%)                | 18 (72.0)                   | 24 (66.7)                    |
| Etiology, HCV/HBV/Others, n (%) | 12 (48.0)/0 (0.0)/13 (52.0) | 18 (50.0)/7 (19.4)/11 (30.6) |
| HCC present, n (%)              | 10 (40)                     | 8 (22.2)                     |
| Child–Pugh score                | 9 (7–11)                    | 7 (6–8)                      |
| ALBI score                      | -1.41 (-1.69– -1.15)        | -1.90 (-2.20– -1.61)         |

|                 |                 |                  |
|-----------------|-----------------|------------------|
| FIB-4 index     | 8.51 (5.5–12.2) | 4.35 (2.22–9.48) |
| Alb (mg/dL)     | 2.8 (2.6–3.1)   | 3.2 (3.0–3.5)    |
| T-Bil (mg/dL)   | 1.9 (1.5–2.7)   | 1.0 (0.7–1.5)    |
| PT activity (%) | 56 (47–65)      | 75 (63–86)       |

Data are presented as medians (interquartile ranges).

AT, antithrombin; HCC, hepatocellular carcinoma; HCV, hepatitis C virus; HBV, hepatitis B virus; ALBI, Albumin-Bilirubin; FIB-4, fibrosis-4; Alb, albumin; T-Bil, total bilirubin; PT, prothrombin time
